# Supplementary material for: The Positive Association between Muscle Mass and Bone Status Is Conserved in Men with Diabetes: A Retrospective Cross-Sectional and Longitudinal Study
Source: MDPI journal article supplement (doi:10.3390/jcm11185370), 2022-09-13
Supplement: s1 [file s1]

## Supplementary Materials

**Table S1. Time-dependent change of bone-related parameters, ASMI, and body profile data.**

| Variables                             | DM ( <i>n</i> = 318) |                |          | Non-DM ( <i>n</i> = 88) |                |          |
|---------------------------------------|----------------------|----------------|----------|-------------------------|----------------|----------|
|                                       | Initial Data         | Follow-Up Data | <i>p</i> | Initial Data            | Follow-Up Data | <i>p</i> |
| Lumbar spine BMD (g/cm <sup>2</sup> ) | 1.154±0.182          | 1.177±0.192    | <0.001   | 1.041±0.195             | 1.060±0.189    | 0.011    |
| Femoral neck BMD (g/cm <sup>2</sup> ) | 0.969±0.151          | 0.972±0.155    | 0.052    | 0.932±0.170             | 0.946±0.164    | 0.010    |
| Total hip BMD (g/cm <sup>2</sup> )    | 1.044±0.160          | 1.049±0.164    | 0.002    | 0.956±0.162             | 0.973±0.154    | 0.001    |
| TBS                                   | 1.451±0.099          | 1.468±0.096    | <0.001   | 1.460±0.096             | 1.479±0.083    | 0.003    |
| ASMI                                  | 7.778±1.009          | 7.826±1.039    | 0.250    | 7.419±0.931             | 7.519±1.156    | 0.001    |
| Weight                                | 74.848±12.259        | 75.032±12.204  | 0.717    | 69.988±11.250           | 71.338±11.336  | <0.001   |
| Height                                | 169.706±6.089        | 169.589±6.221  | 0.002    | 172.119±6.944           | 172.222±7.130  | 0.040    |
| BMI (kg/m <sup>2</sup> )              | 25.935±3.689         | 26.030±3.636   | 0.261    | 23.591±3.369            | 23.998±3.193   | 0.001    |

DM: diabetes mellitus, ASMI: appendicular skeletal muscle index, BMD: bone mineral density, TBS: trabecular bone score, BMI: body mass index
